# Supplementary material for: Conformational plasticity across phylogenetic clusters of RND multidrug efflux pumps and its impact on substrate specificity
Source: PubMed Central journal article supplement (PMC11601597; doi:10.1101/2024.11.22.624703), 2024-11-22
Supplement: media-3.pdf [file media-3.pdf]

1 **Supplementary Information**

2 **Conformational plasticity across phylogenetic clusters of RND multidrug efflux pumps**  
3 **and its impact on substrate specificity**

4 Mariya Lazarova<sup>1</sup>, Thomas Eicher<sup>1</sup>, Clara Börnsen<sup>2</sup>, Hui Zeng<sup>1</sup>, Mohd Athar<sup>3</sup>, Ui Okada<sup>4</sup>, Eiki  
5 Yamashita<sup>5</sup>, Inga M. Spannaus<sup>1</sup>, Max Borgosch<sup>1</sup>, Hi-jea Cha<sup>1</sup>, Attilio V. Vargiu<sup>3</sup>, Satoshi  
6 Murakami<sup>4\*</sup>, Kay Diederichs<sup>6\*</sup>, Achilleas S. Frangakis<sup>2\*</sup>, Klaas M. Pos<sup>1\*</sup>

7 <sup>1</sup> Institute of Biochemistry, Goethe-University Frankfurt, Germany

8 <sup>2</sup> Buchmann Institute for Molecular Life Sciences and Institute of Biophysics, Goethe-  
9 University Frankfurt, Germany

10 <sup>3</sup> Department of Physics, University of Cagliari, Italy

11 <sup>4</sup> Department of Life Science and Technology, Tokyo Institute of Technology, Yokohama, Japan

12 <sup>5</sup> Institute for Protein Research, Osaka University, Japan

13 <sup>6</sup> Department of Biology, University of Konstanz, Germany

14 \* *Corresponding authors*

15 Klaas M. Pos, pos@em.uni-frankfurt.de

16 Achilleas S. Frangakis, achilleas.frangakis@biophysik.org

17 Kay Diederichs, kay.diederichs@uni-konstanz.de

18 Satoshi Murakami, murakami@bio.titech.ac.jp

19

## 20 **Homology modelling, ensemble-docking, and free binding energy calculations**

21 Despite our efforts to determine experimental co-structures with different AcrB substrates  
22 bound to the V612F/W variants, we only obtained co-structures with minocycline. To assess  
23 changes in the DBP interactions for further substrates, we therefore performed a computational  
24 study, namely docking and free energy calculations. For our study we choose four established  
25 AcrB substrates: minocycline, doxorubicin, erythromycin and chloramphenicol. For  
26 minocycline experimental co-structures are present for the wildtype (PDB ID: 4dx5) and the  
27 V612F/W variants (this study). This allows us to evaluate how the experimental data correlate  
28 with the computational study. For doxorubicin an experimental co-structure is present for the  
29 wildtype (PDB ID: 4dx7) which also gives us a cross-reference for the computed results.  
30 Doxorubicin is an anthracycline and its chemical structure and binding site within AcrB (deep  
31 binding pocket, DBP) is very similar to the tetracycline antibiotics. However, in contrast to the  
32 tetracyclines, doxorubicin shows much higher reduction in the resistance activity of the  
33 variants. Further, there is a distinct phenotype discrepancy between the V612F and V612W  
34 variants (Fig. 1 main manuscript). For erythromycin and chloramphenicol, the V612F/W  
35 substitution induced changes of the phenotype that mimic the phenotype of the MdtF variant  
36 and of the proteins from the OqxB cluster, which contain a F at the position equivalent to V612  
37 <sup>1-6</sup>.

38 The top docking binding poses of minocycline closely resemble the experimental structures  
39 (Supplementary, Fig. S5). Moreover, the results of the free binding energy calculation suggest  
40 that minocycline is stabilised by a network of interactions involving the hydrophilic groups of  
41 the ligand and the polar side chains or backbone carbonyl and amide groups of S48, L177,  
42 G179, S180, N274, I277, and A279 (Supplementary, table S4). F178, F610, F615 and the  
43 F/W612 also contribute to the interaction. In wildtype AcrB, R620 greatly contributes to the  
44 free binding energy, but this interaction is lost in the V612F and V612W variants as observed  
45 also in the experimental structures. However, this is compensated by a higher contribution of  
46 the substituted F/W612, as well as further individual side chains (L177, G179, S180 for V612F  
47 and S48, S148 for V612W). The total binding free energy for the variants is similar to the  
48 wildtype with a difference of only 0.5 kcal/mol for V612F and 2.6 kcal/mol for V612W. Thus,  
49 the calculated binding poses and the experimental data both suggest the same mode of  
50 minocycline binding with hydrophilic interactions between the polar groups of the ligand and  
51 polar residues and the backbone of AcrB, and coordination of the aromatic ring of minocycline  
52 between F178, F615 and F/W612. In agreement with the experimental data, the docking

53 calculations confirm that the loss or decrease of the individual interactions due to the shift in  
54 the binding position of minocycline in V612F/W are readily compensated by alternative  
55 interactions with further residues in the binding site.

56 The top binding pose calculated for doxorubicin in the DBP of wildtype AcrB closely resembles  
57 the orientation observed in the previously published experimental structure of the wildtype <sup>7</sup>  
58 (Supplementary, Fig. S5) despite a slight (~1.5 Å) sliding back towards the entrance of the DBP.  
59 A similar but much more pronounced shift (> 4.5 Å) is observed for doxorubicin in V612W. In  
60 V612F, the calculated pose of the ligand is slightly tilted compared to the experimental  
61 structure. The differences in the orientation of V612F compared to the wildtype also induces  
62 changes in the coordination network, and many of the interactions observed for the wildtype  
63 are weakened or abolished in V612F (e.g. with T44, S46, S128, E130, F136) (Supplementary,  
64 table S4). Even though this is compensated by stronger or additional interactions with S134,  
65 F178, G179, I277, F612, F615, R620 and F628, the total free binding energy for V612F is 7.1  
66 kcal/mol higher than the wildtype. For V612W, the interactions are weaker compared to the  
67 wildtype for the same amino acid sidechains as for V612F. In contrast to V612F, for V612W  
68 this is compensated mainly by polar interactions with the serine-rich loop (S132, S133, S134),  
69 and with T44 and Q89, owned to the shift in the position of the ligand in the V612W structure.  
70 The difference in the total binding energy for V612W compared to the wildtype (0.7 kcal/mol)  
71 is much lower than for V612F.

72 Similarly to minocycline, in the docking poses for doxorubicin a sliding of the ligand is  
73 observed for V612W and indeed the overlay with the experimental doxorubicin structure shows  
74 a clear steric overlap of the ligand with the W612 side chain (Supplementary, Fig. S5). However,  
75 in the V612F docking results, such shift in the ligand position is not observed. Instead, here the  
76 F612 side chain is flipped away from the ligand binding site. As it can be seen from the overlay  
77 of the experimental V612F structure with the doxorubicin docking pose, F612 in the  
78 experimental structure would clash with the ligand (Fig. SI1). The difference in the orientations  
79 of F612 in the experimental and docking structures might represent alternative conformations  
80 that F612, and potentially W612, can adopt.

**V612F****V612W**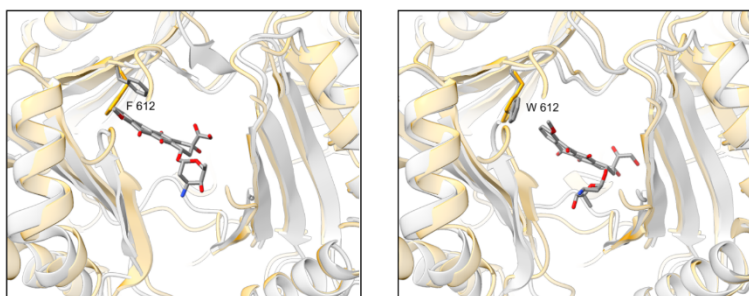

81

82 **Figure SI1: Overlay of the experimental structures of AcrB V612F and V612W with the doxorubicin**  
83 **docking poses.** The figure shows the top docking pose of doxorubicin in the DBP of the V612F and V612W  
84 variants. AcrB is coloured grey with F/W612 and doxorubicin shown as sticks and coloured by atom type with  
85 carbon – grey, oxygen – red, and nitrogen – blue. The docking results are overlaid with the experimental  
86 crystallographic structures of AcrB V612F and V612W (this study) coloured in yellow.

87 The experimental and computational results for the binding of minocycline and the  
88 computational results for the binding of doxorubicin suggest that the steric hindrance introduced  
89 by the V612F/W substitution results in a sliding of the substrate towards the entrance of the  
90 DBP. Besides minocycline, one further representative of the tetracycline class was found to  
91 bind in the same position in the DBP<sup>8</sup> and it is feasible that other tetracyclines bind in a similar  
92 fashion as well. Thus, it is likely that similar sliding of the drug occurs, but the versatility of the  
93 DBP presumably allows accommodation of the substrate and formation of an alternative  
94 interaction network, explaining the marginal change in the resistance phenotype of V612F/W  
95 against minocycline and other tetracyclines (see Fig. 1 main manuscript).

96 Despite the discussed differences in the binding poses of minocycline and doxorubicin, their  
97 binding sites are very similar in AcrB wildtype, V612F and V612W (Supplementary, Fig. S5).  
98 In contrast, the top binding poses of chloramphenicol differ greatly in the three proteins (Fig.  
99 SI2a). Chloramphenicol is one of the smallest AcrB ligands and with a van-der-Waals volume  
100 of 249 Å<sup>3</sup> (calculated with Chemicalize, <https://chemicalize.com/>) it is almost 15x smaller than  
101 the volume of the DBP (approximately 3700 Å<sup>3</sup><sup>9</sup>). The ligand is small, flexible and  
102 amphipathic, and it is likely that it can be coordinated in different grooves within the DBP.  
103 Molecular dynamics (MD) simulations have shown that chloramphenicol frequently flips in the  
104 DBP of the T state<sup>10,11</sup>, suggesting that this substrate can be accommodated in different poses  
105 and frequently changes between them. A cryo-EM structure of AcrB in the presence of  
106 chloramphenicol showing a density for the ligand in the DBP has been reported<sup>10</sup>. An overlay  
107 of the electron density map of this structure with the docking poses for the wildtype, V612F

108 and V612W shows that the putative ligand density is in proximity of the docking pose for the  
109 wildtype (Fig. SI2b).

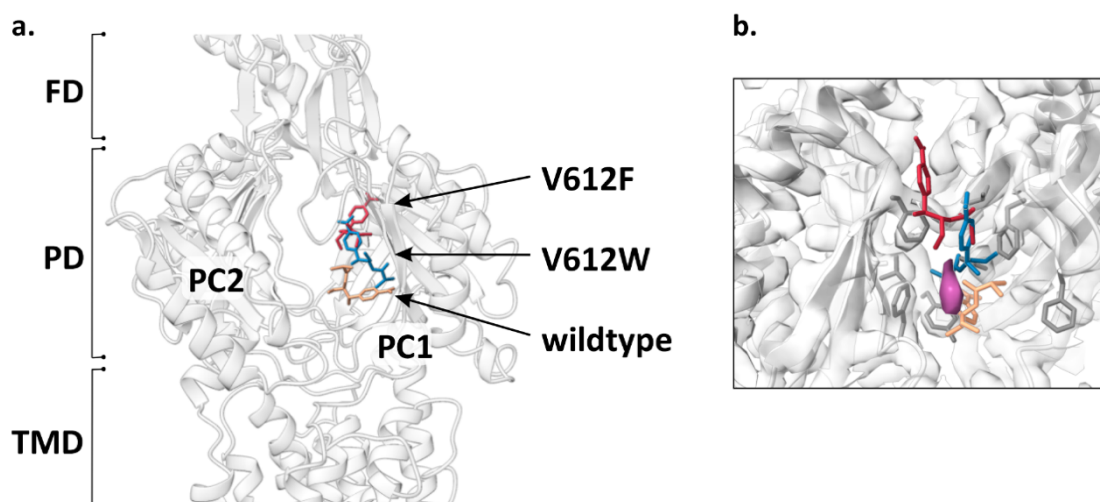

111 **Figure SI21: Chloramphenicol binding in the DBP of AcrB.** (a) The top docking poses for chloramphenicol in  
112 the DBP of AcrB wildtype, V612F and V612W. The AcrB structure is outlined in the cartoon representation.  
113 Chloramphenicol docking poses are shown as sticks and coloured yellow for the wildtype, red for V612F and blue  
114 for V612W. Abbreviations: FD – funnel domain, PD – porter domain, TMD – transmembrane domain. The PC1  
115 and PC2 subdomains are indicated. (b) Overlay of the top docking poses for chloramphenicol with the  
116 experimental AcrB wildtype structure in the presence of this substrate (PDB ID: 6sgr). The docking poses for the  
117 wildtype, V612F and V612W are shown as sticks coloured as in (a). The cryo-EM electron density map of the  
118 experimental structure is shown as surface with the putative chloramphenicol density highlighted in purple. The  
119 residues of the DBP are shown as sticks in grey.

120 The different computational poses might indicate distinct binding sites within the DBP. The  
121 reason why one of these binding sites is preferred in the wildtype and the others in the variants,  
122 might be connected to the introduced substitution. In both V612F and V612W, the ligand is  
123 pulled up in the DBP and oriented so that the aromatic ring of chloramphenicol is facing the  
124 F/W612 side chain. Particularly in V612W it is well evident how the aromatic ring of the ligand  
125 is sandwiched between F178, F615 and W612 and these interactions likely stabilise the binding  
126 at this position. In the F612 variant the ligand similarly engages in aromatic interactions with  
127 F178 and F612 (Supplementary, Fig. S5 and table S4).

128 For chloramphenicol, a slight increase in the resistance conferred by V612F and V612W was  
129 observed (see Fig. 1 main manuscript). One can speculate that chloramphenicol can diffuse in  
130 and out of the AP and DBP while interacting with multiple low affinity binding sites in the PD.  
131 The additional aromatic interactions with F/W612 could stabilise the interactions with the  
132 hydrophobic cluster, pulling chloramphenicol further into the DBP and increasing its retention

133 time, thus allowing a more efficient transport. Similar consideration might apply for further  
134 flexible, amphipathic, low molecular weight substrates that contain an aromatic ring. One AcrB  
135 substrate that fits this description is linezolid, and for this substrate a slight increase in the  
136 resistance conferred by V612F/W was observed as well.

137 Experimental co-structures of erythromycin show binding of the substrate at the interface  
138 between the AP and the DBP in the L state of *E. coli* AcrB<sup>12–14</sup>. In the close homolog AcrB  
139 from *K. pneumoniae* (96 % sequence similarity to *E. coli* AcrB), erythromycin binding within  
140 the DBP in the T state has been described<sup>15</sup> (Fig. SI3a). Presumably, this substrate initially  
141 binds in the L state and is guided to the interior of the porter domain during the transition from  
142 L to T. The docking pose of erythromycin in AcrB wildtype (T state) is in closer proximity to  
143 the DBP compared to the experimental co-structure of erythromycin bound to the L state (Fig.  
144 SI3a). However, the docking position of erythromycin does not reach the same binding site as  
145 the seen in the experimental structure of *K. pneumoniae* AcrB in the T state. As the calculated  
146 pose is located between both binding sites seen in the experimentally derived co-structures, it  
147 might represent an intermediate interaction mode along the way from the AP towards the DBP  
148 (Fig. SI3a).

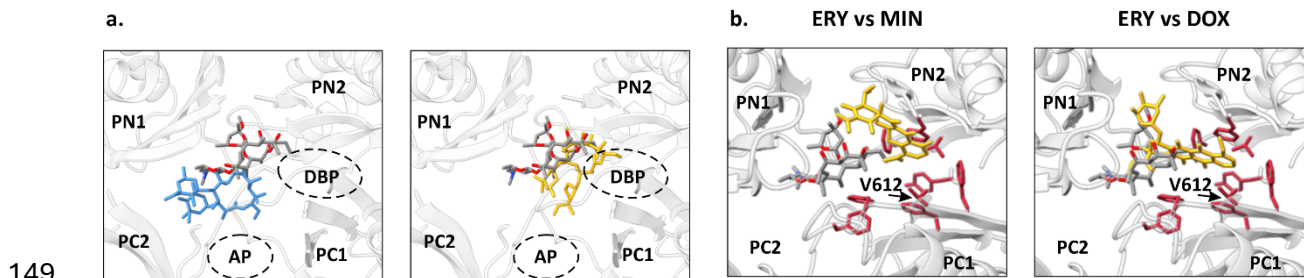

150 **Figure SI3: Erythromycin binding sites in the PD of AcrB.** (a) In experimental co-structures of *E. coli* AcrB,  
151 erythromycin binds at the interface of the AP and DBP in the L state monomer (blue, left panel, PDB ID: 3aoc). In  
152 the close homolog AcrB from *K. pneumoniae*, the substrate was found in the DBP in the T state monomer (yellow,  
153 right panel, PDB ID: 8ffs). The top docking pose for AcrB wildtype (coloured by atom type with carbon – grey,  
154 oxygen – red, and nitrogen – blue) was overlaid with both structures. The PD is outlined as cartoon and the PN1,  
155 PN2, PC1 and PC2 subdomains as well as the AP and DBP are indicated. (b) An overlay of the docking pose of  
156 erythromycin with the minocycline (MIN, left panel) and doxorubicin (DOX, right panel) structures. A top view  
157 of the porter domain is shown in grey and the PN1, PN2, PC1 and PC2 subdomains are indicated. The residues of  
158 the DBP are shown as sticks in red and V612 is indicated. The top docking pose of erythromycin in wildtype AcrB  
159 is shown as sticks coloured by atom type with carbon – grey, oxygen – red, and nitrogen – blue. Minocycline and  
160 doxorubicin from the experimental structures (PDB ID: 4dx5 and 4dx7 respectively) are shown as sticks in yellow.

161 The docking pose of erythromycin is near the entrance of the DBP, but it does not reach the  
162 DBP groove in contrast to minocycline and doxorubicin (Fig. SI3b). The latter two bind deeply

163 within the hydrophobic groove cluster and are in immediate vicinity of the residue at position  
164 612. Erythromycin, however, is located further away from this residue. Therefore, the steric  
165 effects of the V612F/W substitution, that were observed for minocycline and doxorubicin, are  
166 likely less relevant for erythromycin. Further, erythromycin does not contain an aromatic ring  
167 for interaction with the introduced aromatic substitution like e.g. chloramphenicol. Considering  
168 the greater distance to and minor interactions with the residue at position 612, it is possible that  
169 the V612F/W substitutions have a less pronounced effect on the interaction network of  
170 erythromycin compared to the other investigated substrates. In agreement with these  
171 considerations, the docking calculations showed identical binding poses for erythromycin in  
172 AcrB wildtype, V612F and V612W and similar binding energies with only a minor difference  
173 due to the contribution from F/W612 (Supplementary, Fig. S5 and table S4).

174 As the experimental structures of erythromycin show binding of this substrate in the AP-DBP-  
175 interface in the L state, it is plausible that the drug is sequestered from the periplasm through  
176 the AP in this state. Likely the substrate is then guided to the PD interior during the transition  
177 from L to T and finally reached the DBP in the T state. Potentially, the initial interactions require  
178 the PD architecture in the L state and are less favourable if the AP adopts the T state structure,  
179 as proposed earlier<sup>11</sup>. In contrast to the wildtype, the V612 variants exhibits a structure with  
180 increased abundance of the T state at the expense of the L state. The reduced amount of L state  
181 monomers for initial binding might compromise the transport of substrates such as  
182 erythromycin, that require the interactions for initial uptake in this state.

## 183 Methods

184 Ensemble-docking calculations were performed for all compounds on the DBP of the T state  
185 (DBP<sub>T</sub>) of AcrB (lined by residues S46, Q89, S128, E130, S134, F136, V139, Q176, L177,  
186 F178, G179, S180, E273, N274, D276, I277, A279, A286, P326, Y327, M573, F610,  
187 V/F/W612, F617, R620, F628, F664, F666, L668, P669, V672<sup>16</sup>) using the software GNINA  
188<sup>17</sup>. Following a previous approach<sup>18,19</sup>, we generated a set of AcrB (wt, V612F, and V612W)  
189 structures featuring the largest structural variance at the DBP<sub>T</sub>, in order to account for minor to  
190 medium structural changes at this site, which notoriously influence the outcome of docking  
191 calculations<sup>20</sup>. The list of AcrB structures we employed includes the following PDB IDs: 2dhh,  
192 2dr6, 2drd, 2gif, 2hrt, 2j8s, 3aoa, 3aob, 3aoc, 3aod, 3noc, 3nog, 3w9h, 4dx5, 4dx6, 4dx7, 4u8v,  
193 4u8y, 4u95, 4u96, 4zit, 4ziv, 4zjl, 5jmn, 5nc5, 5yil, 6q4n, 6q4o, 6q4p. In addition, for the V612F  
194 and the V612W AcrB variants, we included the new experimental structures reported here. Note  
195 that some of the afore listed structures contain gaps, modified residues, and mutations.  
196 Therefore, we generated consistent structures of the wt as well as the two variants of AcrB by  
197 means of homology modelling calculations, using the software MODELLER 10.2<sup>21</sup>. More  
198 precisely, for the wt structures only the missing parts were modelled, using the wildtype  
199 structure (PDB ID: 4dx5) as a template. The models of the mutant structures were generated by  
200 modelling only the amino acids within 5 Å from the mutated residues, using as templates the  
201 experimental V612F and V612W structures. In both cases, the list of residues was the following:  
202 F178, I278, F610, A611, F/W612, N613, F615, G625, I626, F628. The rest of the structure was  
203 not modified, apart for gaps and additional mutations. Therefore, a multi-template homology  
204 modelling was performed for both the wt and the mutant structures. Moreover, we introduced  
205 the F/W612 mutations within the asymmetric LTO structures based on the TTT experimental  
206 geometries of V612F/W. Before running homology modelling calculations, all structures were  
207 aligned to the DBP<sub>T</sub> of the structure with PDB ID 4dx5, and only the amino acids from 1 to  
208 1030 (in each chain) were used to ensure that all the models will have the same length.

209 After generating a pool of AcrB structures identical in sequence, we reassign protonation states  
210 of the protein following previous literature<sup>9,22</sup>. Next, we aligned all structures (29 for wt and  
211 31 for mutants) to the DBP<sub>T</sub> of that identified by the PDB ID 4dx5 and calculated 29x29 (wt)  
212 and 31x31 (mutants) matrices of pairwise RMSDs values. From these matrices, we retained  
213 only the structures displaying RMSDs (calculated on all the heavy atoms of DBP<sub>T</sub>) larger than  
214 1 Å from each other. For pairs with RMSDs values below this threshold, we removed the  
215 structure with the lowest resolution from the pool.



216 The following structure data files (.sdf) were used to prepare the pdb files for docking with  
217 GNINA: CAM and ERY were downloaded from our antibiotic database (structure optimized  
218 by means of quantum-mechanical calculations)<sup>23</sup>, while MIN and DOX were taken from the  
219 PDB database (IDs 4dx5 and 4dx7, respectively). For each ligand, the dominant protonation  
220 states at physiological pH were assigned by ChemAxon's Marvin suite of program. Docking  
221 was performed centring the grid on DBP<sub>T</sub> and using the following parameters: exhaustiveness:  
222 512 (default 8); nmodes: 10.

223 Poses were first filtered according to the Convolutional Neural Networks (CNN) score provided  
224 by GNINA (which ranges from 0 – very unlikely pose – to 1 – very likely that the pose  
225 represents a true structure), retaining only those with a value larger than 2/3. Next, these poses  
226 were ranked according to their estimated affinity to the binding site.

227 Estimation of the binding free energy were obtained through the MM/GBSA approach<sup>24</sup>  
228 implemented in the MMPBSA.py tool of AMBER22<sup>25</sup>, following the same protocol used in  
229 previous studies<sup>26,27</sup>. This approach provides an intrinsically simple method for decomposing  
230 the free energy of binding into contributions from single atoms and residues, as well as ligand-  
231 residue pairs<sup>28</sup>. The solute conformational entropy contribution (TΔSconf) was not evaluated  
232<sup>24</sup>. Calculations were performed on the top pose of each complex.

233

## 234 References

- 235 1. Bharatham, N. *et al.* Structure and function relationship of OqxB efflux pump from  
236 *Klebsiella pneumoniae*. *Nature communications* **12**, 5400; 10.1038/s41467-021-25679-0  
237 (2021).
- 238 2. Coyne, S., Rosenfeld, N., Lambert, T., Courvalin, P. & Périchon, B. Overexpression of  
239 resistance-nodulation-cell division pump AdeFGH confers multidrug resistance in  
240 *Acinetobacter baumannii*. *Antimicrobial agents and chemotherapy* **54**, 4389–4393;  
241 10.1128/AAC.00155-10 (2010).
- 242 3. Hansen, L. H., Jensen, L. B., Sørensen, H. I. & Sørensen, S. J. Substrate specificity of the  
243 OqxAB multidrug resistance pump in *Escherichia coli* and selected enteric bacteria. *The*  
244 *Journal of antimicrobial chemotherapy* **60**, 145–147; 10.1093/jac/dkm167 (2007).
- 245 4. Kato, T. *et al.* Crystal structures of multidrug efflux transporters from *Burkholderia*  
246 *pseudomallei* suggest details of transport mechanism. *Proceedings of the National*  
247 *Academy of Sciences of the United States of America* **120**, e2215072120;  
248 10.1073/pnas.2215072120 (2023).
- 249 5. Köhler, T. *et al.* Characterization of MexE-MexF-OprN, a positively regulated multidrug efflux  
250 system of *Pseudomonas aeruginosa*. *Molecular microbiology* **23**, 345–354; 10.1046/j.1365-  
251 2958.1997.2281594.x (1997).
- 252 6. Bohnert, J. A., Schuster, S., Fähnrich, E., Trittler, R. & Kern, W. V. Altered spectrum of  
253 multidrug resistance associated with a single point mutation in the *Escherichia coli* RND-  
254 type MDR efflux pump YhiV (MdtF). *The Journal of antimicrobial chemotherapy* **59**, 1216–  
255 1222; 10.1093/jac/dkl426 (2007).
- 256 7. Eicher, T. *et al.* Transport of drugs by the multidrug transporter AcrB involves an access and  
257 a deep binding pocket that are separated by a switch-loop. *Proceedings of the National*  
258 *Academy of Sciences of the United States of America* **109**, 5687–5692;  
259 10.1073/pnas.1114944109 (2012).
- 260 8. Ornik-Cha, A. *et al.* Structural and functional analysis of the promiscuous AcrB and AdeB  
261 efflux pumps suggests different drug binding mechanisms. *Nature communications* **12**,  
262 6919; 10.1038/s41467-021-27146-2 (2021).
- 263 9. Ramaswamy, V. K., Vargiu, A. V., Mallocci, G., Dreier, J. & Ruggerone, P. Molecular Rationale  
264 behind the Differential Substrate Specificity of Bacterial RND Multi-Drug Transporters.  
265 *Scientific reports* **7**, 8075; 10.1038/s41598-017-08747-8 (2017).
- 266 10. Du, D. *et al.* Interactions of a Bacterial RND Transporter with a Transmembrane Small  
267 Protein in a Lipid Environment. *Structure (London, England : 1993)* **28**, 625-634.e6;  
268 10.1016/j.str.2020.03.013 (2020).
- 269 11. Vargiu, A. V. & Nikaido, H. Multidrug binding properties of the AcrB efflux pump  
270 characterized by molecular dynamics simulations. *Proceedings of the National Academy of*  
271 *Sciences of the United States of America* **109**, 20637–20642; 10.1073/pnas.1218348109  
272 (2012).
- 273 12. Nakashima, R., Sakurai, K. & Yamaguchi, A. *Structures of the multidrug exporter AcrB reveal*  
274 *a proximal multisite drug-binding pocket* (2011).

- 275 13. Ababou, A. & Koronakis, V. Structures of Gate Loop Variants of the AcrB Drug Efflux Pump  
276 Bound by Erythromycin Substrate. *PloS one* **11**, e0159154; 10.1371/journal.pone.0159154  
277 (2016).
- 278 14. Tam, H.-K. *et al.* Allosteric drug transport mechanism of multidrug transporter AcrB. *Nature*  
279 *communications* **12**, 3889; 10.1038/s41467-021-24151-3 (2021).
- 280 15. Zhang, Z., Morgan, C. E., Bonomo, R. A. & Yu, E. W. Cryo-EM Structures of the Klebsiella  
281 pneumoniae AcrB Multidrug Efflux Pump. *mBio* **14**, e0065923; 10.1128/mbio.00659-23  
282 (2023).
- 283 16. Athar, M. *et al.* Tripartite efflux pumps of the RND superfamily: what did we learn from  
284 computational studies? *Microbiology (Reading, England)* **169**; 10.1099/mic.0.001307  
285 (2023).
- 286 17. McNutt, A. T. *et al.* GNINA 1.0: molecular docking with deep learning. *Journal of*  
287 *cheminformatics* **13**, 43; 10.1186/s13321-021-00522-2 (2021).
- 288 18. Malvacio, I. *et al.* Molecular basis for the different interactions of congeneric substrates  
289 with the polyspecific transporter AcrB. *Biochimica et biophysica acta. Biomembranes*  
290 **1861**, 1397–1408; 10.1016/j.bbamem.2019.05.004 (2019).
- 291 19. Trampari, E. *et al.* Functionally distinct mutations within AcrB underpin antibiotic resistance  
292 in different lifestyles. *npj antimicrobials and resistance* **1**, 2; 10.1038/s44259-023-00001-8  
293 (2023).
- 294 20. Basciu, A. *et al.* No dance, no partner! A tale of receptor flexibility in docking and virtual  
295 screening. In *Virtual Screening and Drug Docking* (Elsevier2022), Vol. 59, pp. 43–97.
- 296 21. Eswar, N. *et al.* Comparative protein structure modeling using Modeller. *Current protocols*  
297 *in bioinformatics* **Chapter 5**, Unit-5.6; 10.1002/0471250953.bi0506s15 (2006).
- 298 22. Eicher, T. *et al.* Coupling of remote alternating-access transport mechanisms for protons  
299 and substrates in the multidrug efflux pump AcrB. *eLife* **3**; 10.7554/eLife.03145 (2014).
- 300 23. Gervasoni, S. *et al.* AB-DB: Force-Field parameters, MD trajectories, QM-based data, and  
301 Descriptors of Antimicrobials. *Scientific data* **9**, 148; 10.1038/s41597-022-01261-1 (2022).
- 302 24. Genheden, S. & Ryde, U. The MM/PBSA and MM/GBSA methods to estimate ligand-binding  
303 affinities. *Expert opinion on drug discovery* **10**, 449–461; 10.1517/17460441.2015.1032936  
304 (2015).
- 305 25. Case, D. A. *et al.* AmberTools. *Journal of chemical information and modeling* **63**, 6183–  
306 6191; 10.1021/acs.jcim.3c01153 (2023).
- 307 26. Vargiu, A. V., Ruggerone, P., Opperman, T. J., Nguyen, S. T. & Nikaido, H. Molecular  
308 mechanism of MBX2319 inhibition of Escherichia coli AcrB multidrug efflux pump and  
309 comparison with other inhibitors. *Antimicrobial agents and chemotherapy* **58**, 6224–6234;  
310 10.1128/AAC.03283-14 (2014).
- 311 27. Sjuts, H. *et al.* Molecular basis for inhibition of AcrB multidrug efflux pump by novel and  
312 powerful pyranopyridine derivatives. *Proceedings of the National Academy of Sciences of*  
313 *the United States of America* **113**, 3509–3514; 10.1073/pnas.1602472113 (2016).
- 314 28. Gohlke, H., Kiel, C. & Case, D. A. Insights into protein-protein binding by binding free energy  
315 calculation and free energy decomposition for the Ras-Raf and Ras-RalGDS complexes.  
316 *Journal of molecular biology* **330**, 891–913; 10.1016/s0022-2836(03)00610-7 (2003).
