# Supplementary material for: Conformational plasticity across phylogenetic clusters of RND multidrug efflux pumps and its impact on substrate specificity
Source: PubMed Central journal article supplement (PMC11601597; doi:10.1101/2024.11.22.624703), 2024-11-22
Supplement: media-4.pdf [file media-4.pdf]

## Biological replicate 1, technical replicate 1

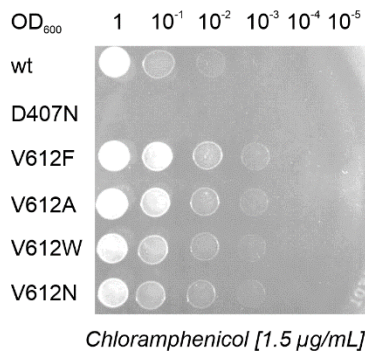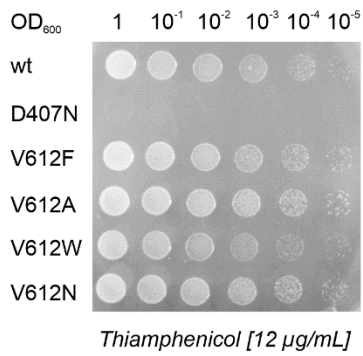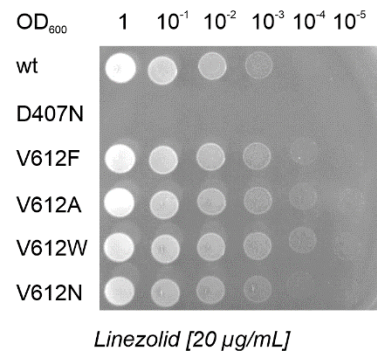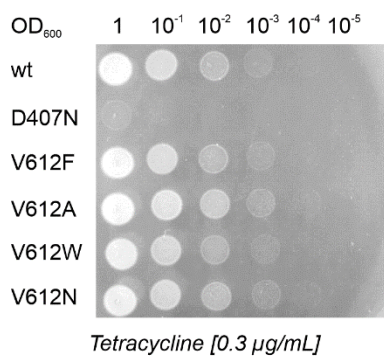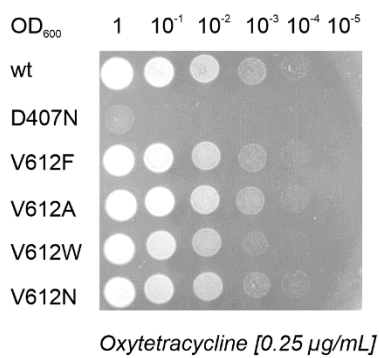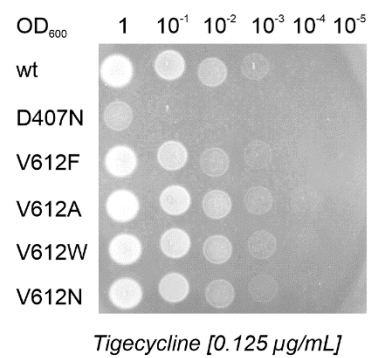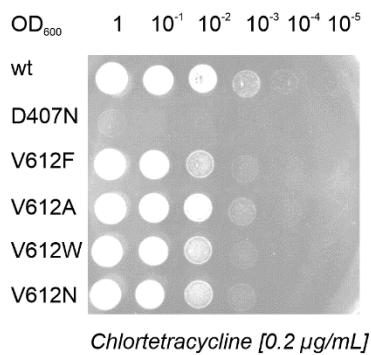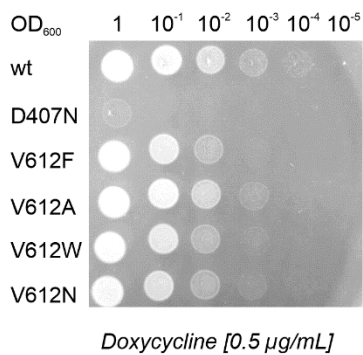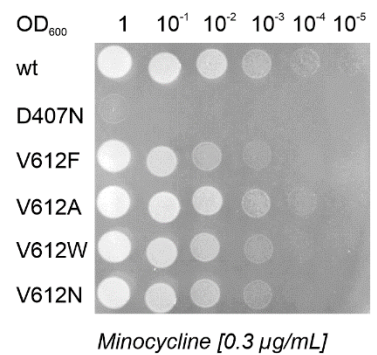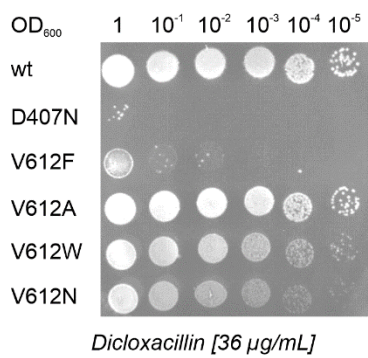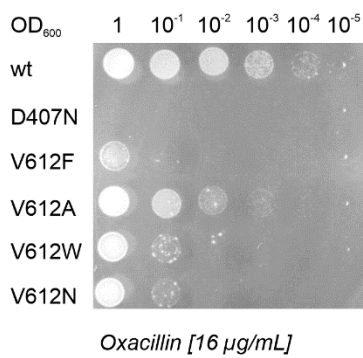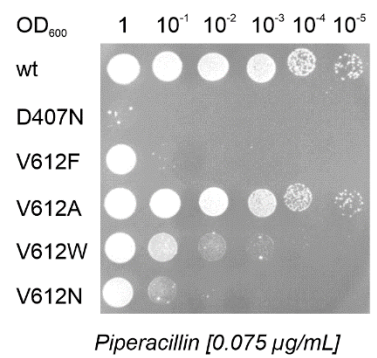

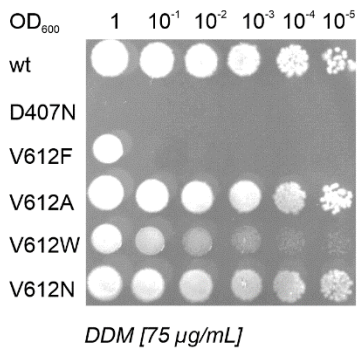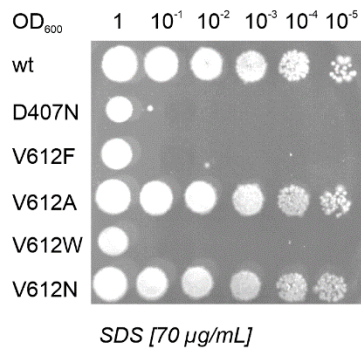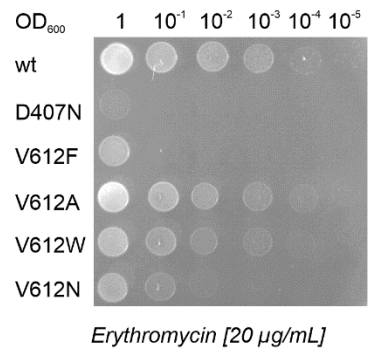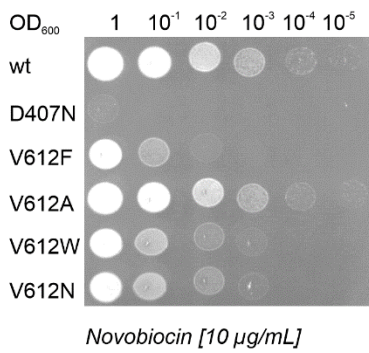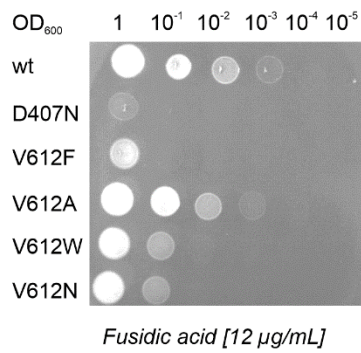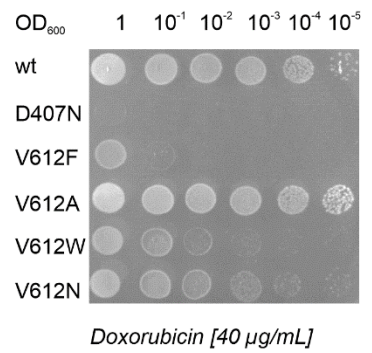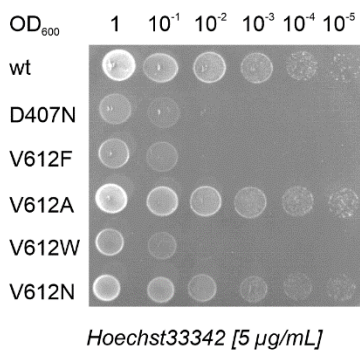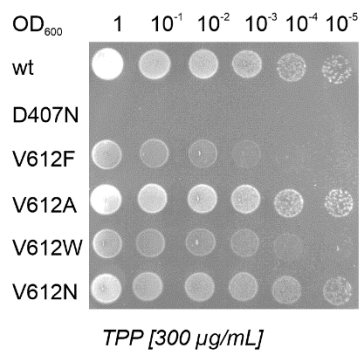

## Biological replicate 1, technical replicate 2

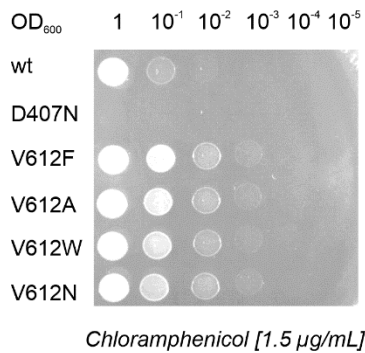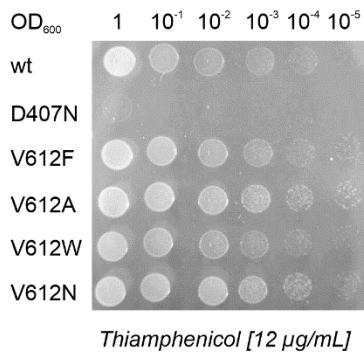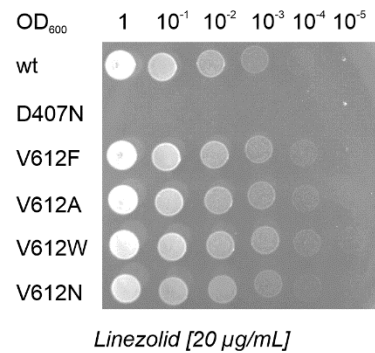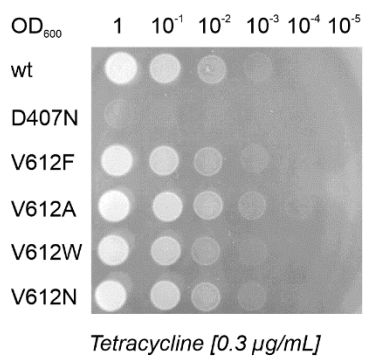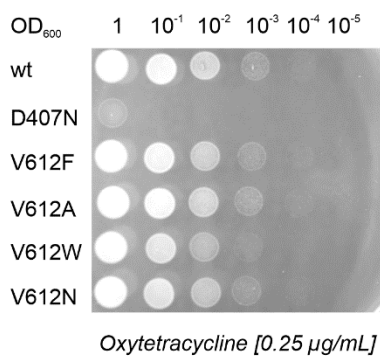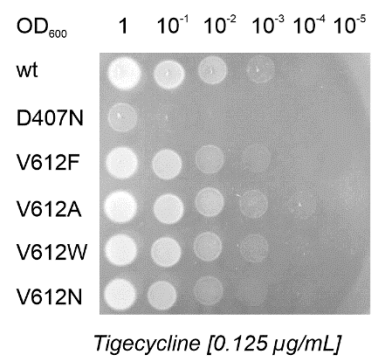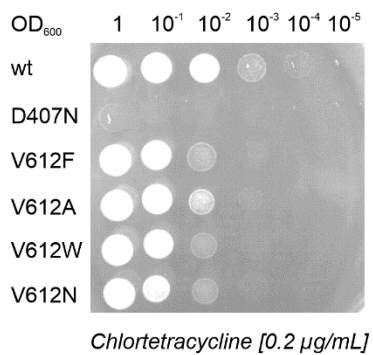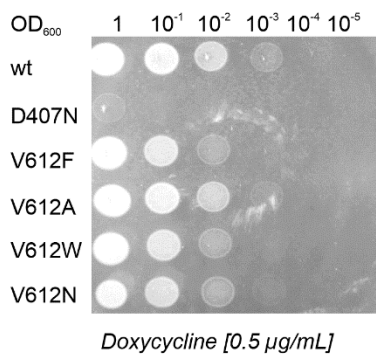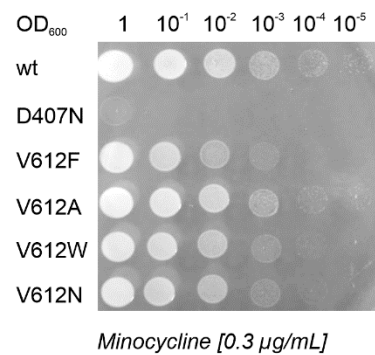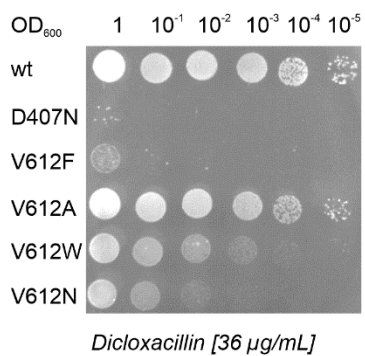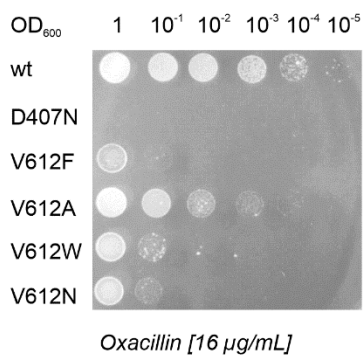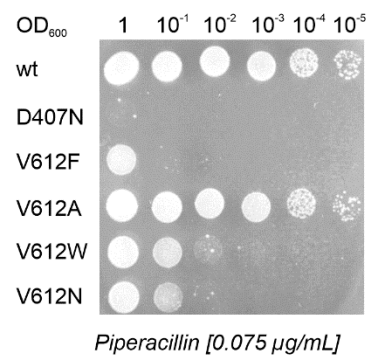

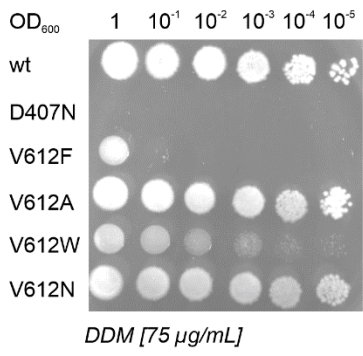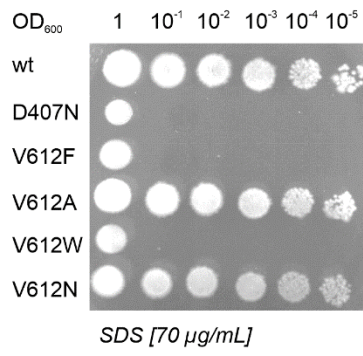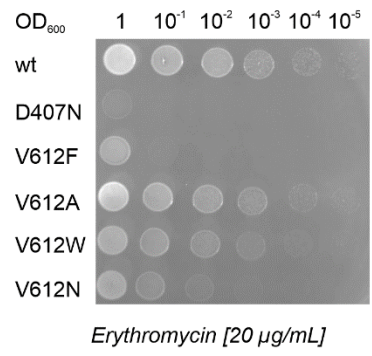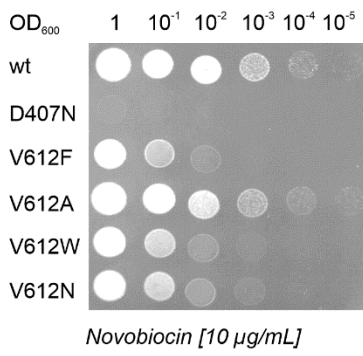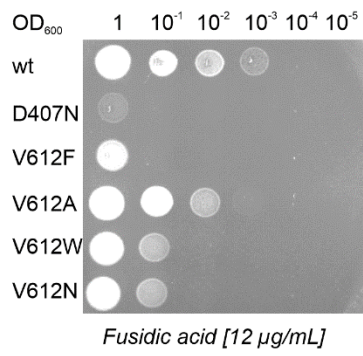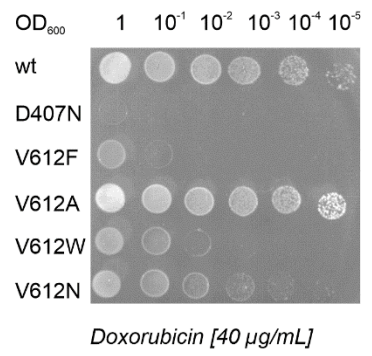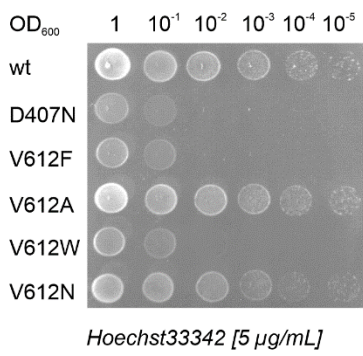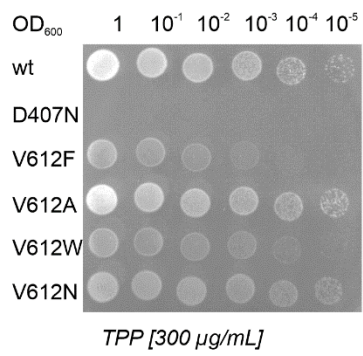

## Biological replicate 2, technical replicate 1

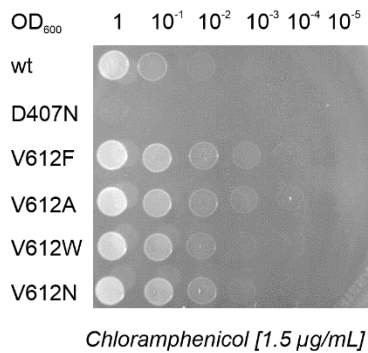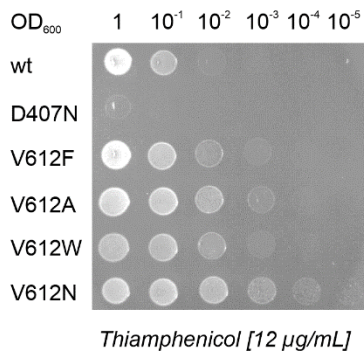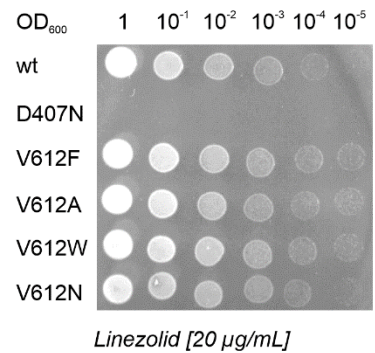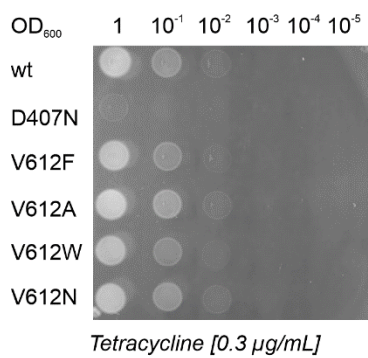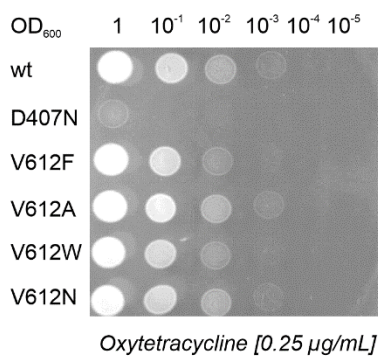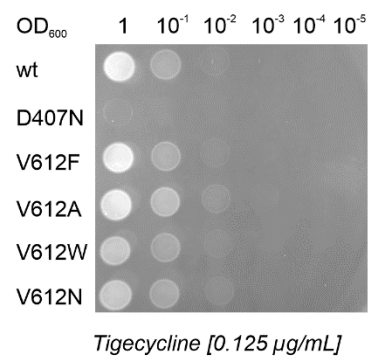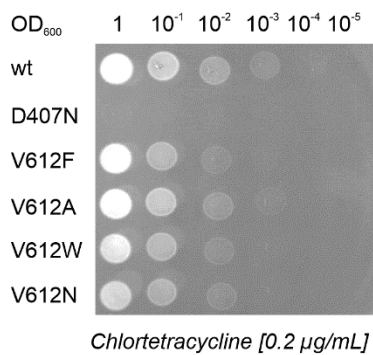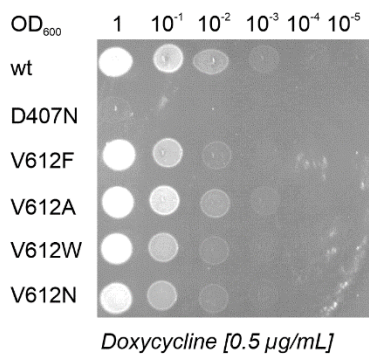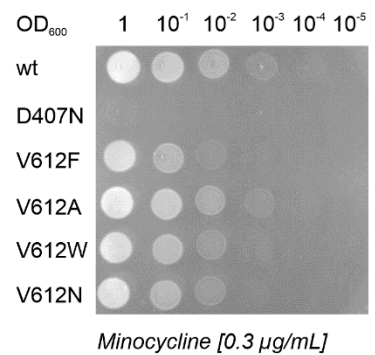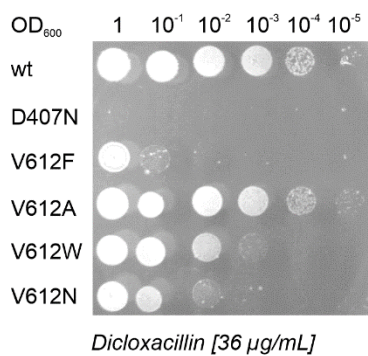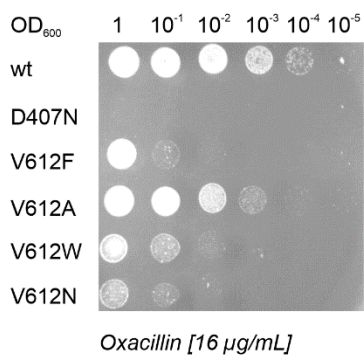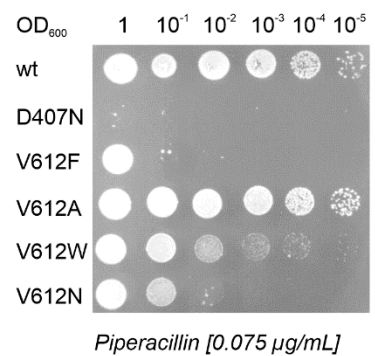

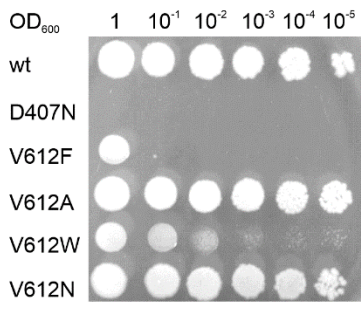

*DDM [75 µg/mL]*

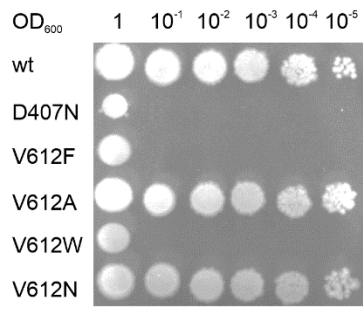

*SDS [70 µg/mL]*

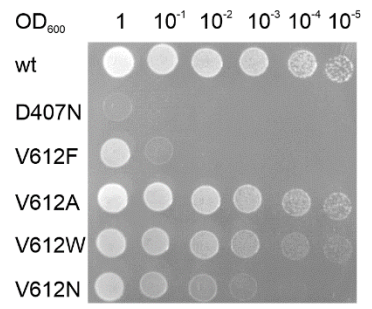

*Erythromycin [20 µg/mL]*

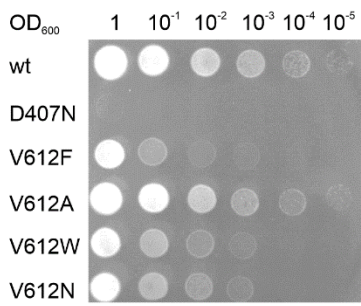

*Novobiocin [10 µg/mL]*

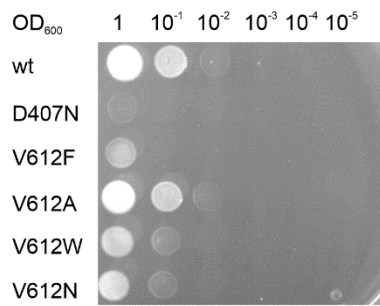

*Fusidic acid [12 µg/mL]*

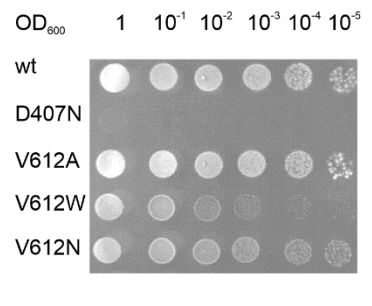

*Doxorubicin [40 µg/mL]*

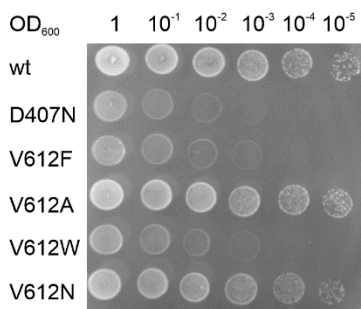

*Hoechst33342 [5 µg/mL]*

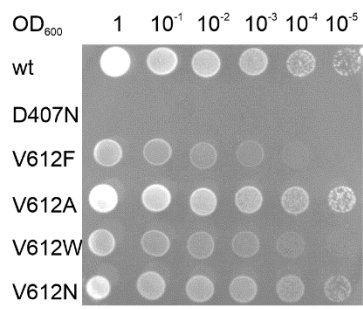

*TPP [300 µg/mL]*

## Biological replicate 2, technical replicate 2

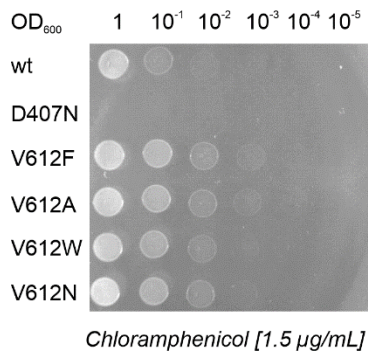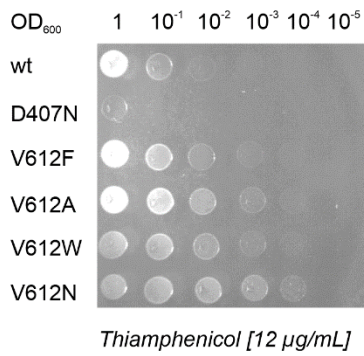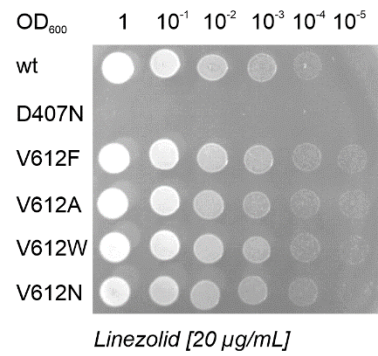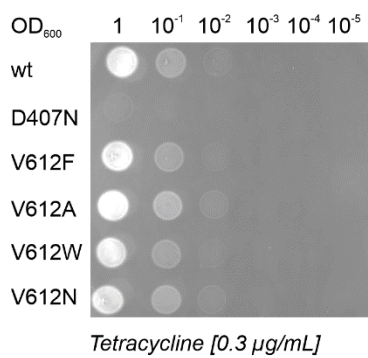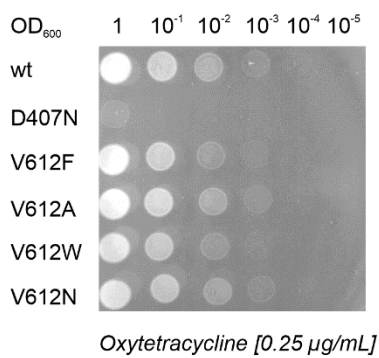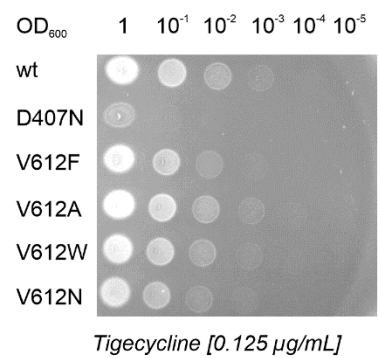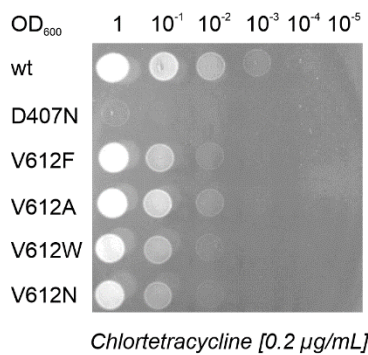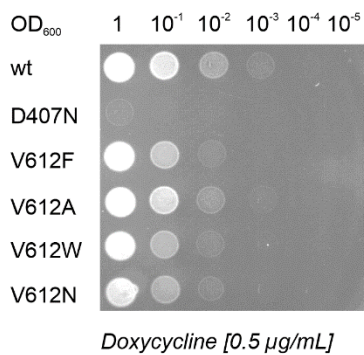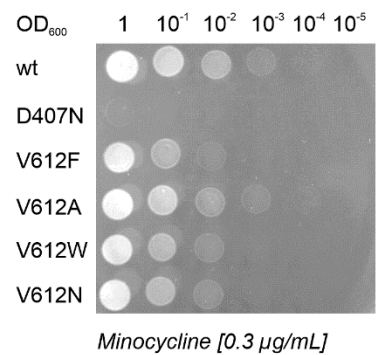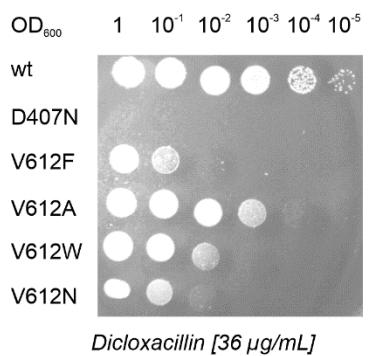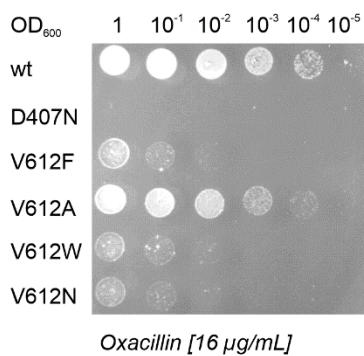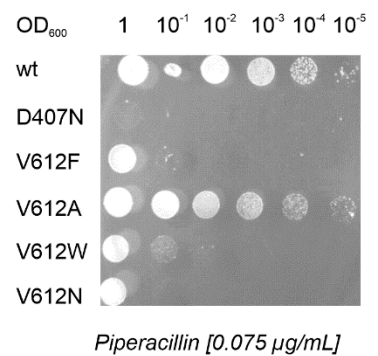

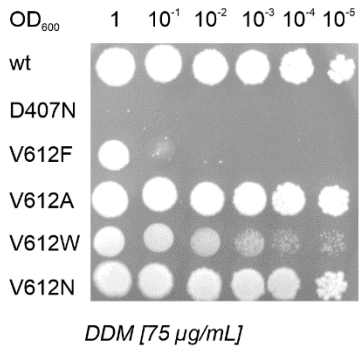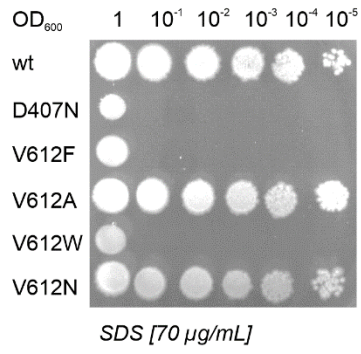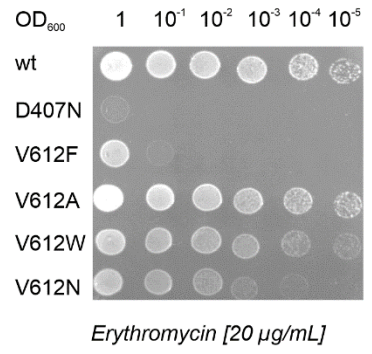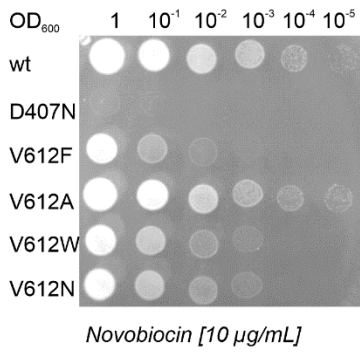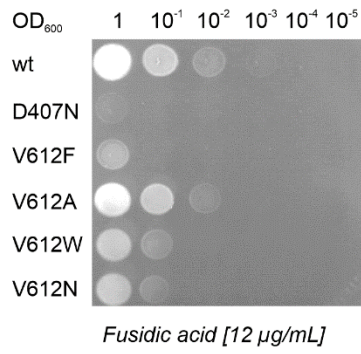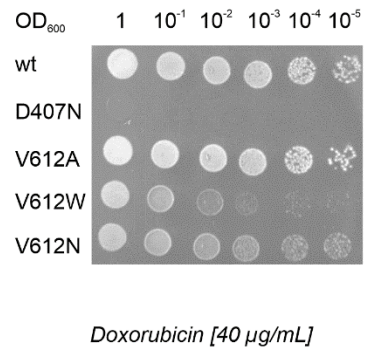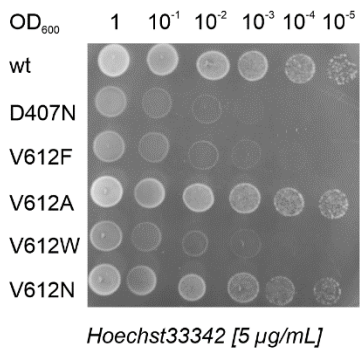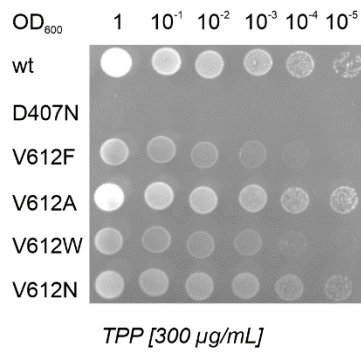



Biological replicate 3, technical replicate 1

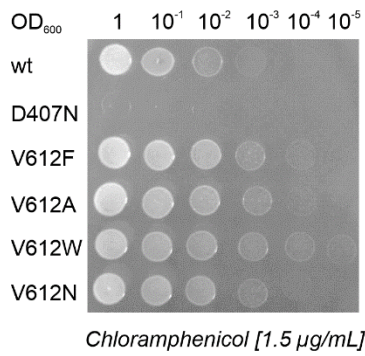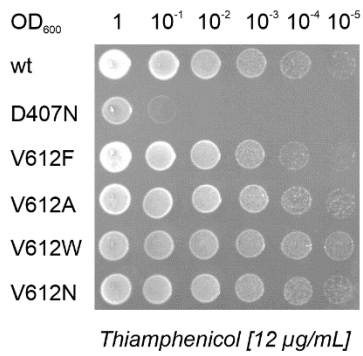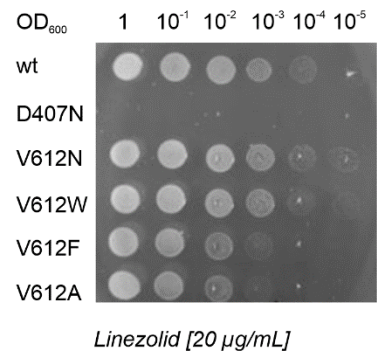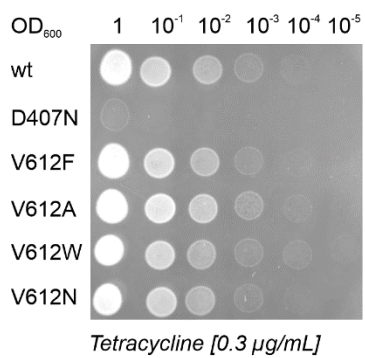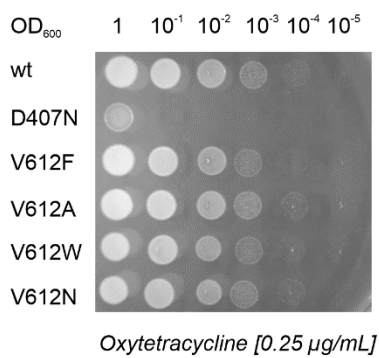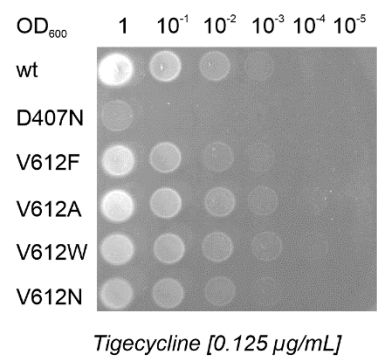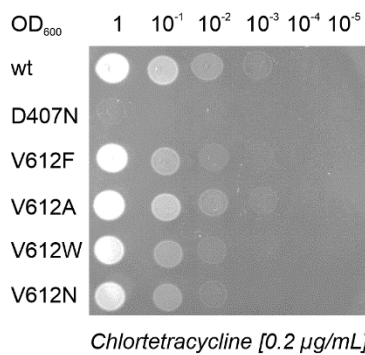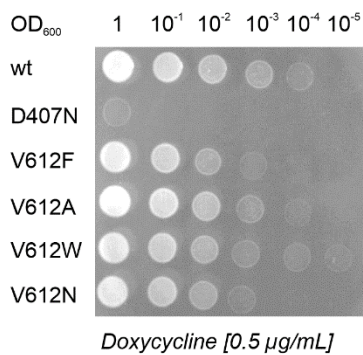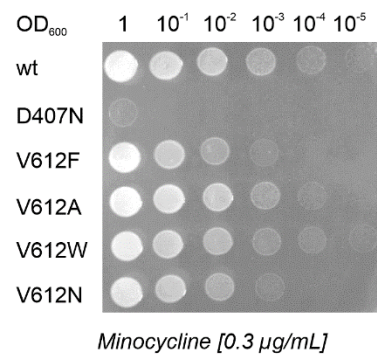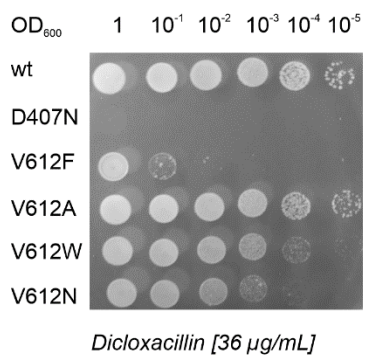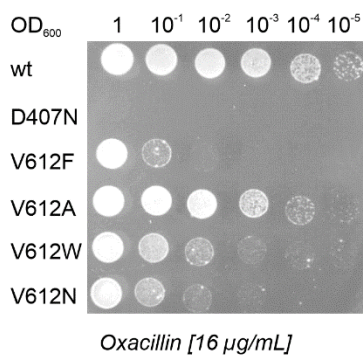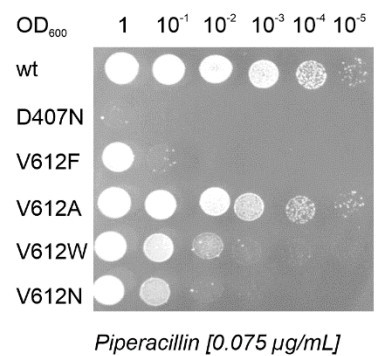

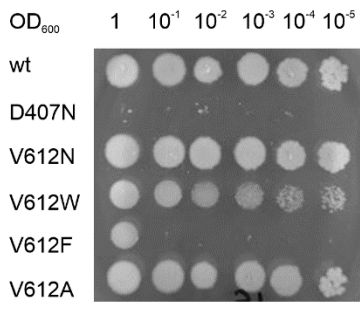

*DDM [75 µg/mL]*

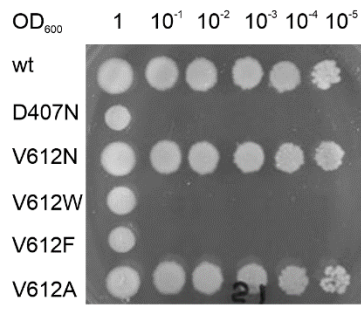

*SDS [70 µg/mL]*

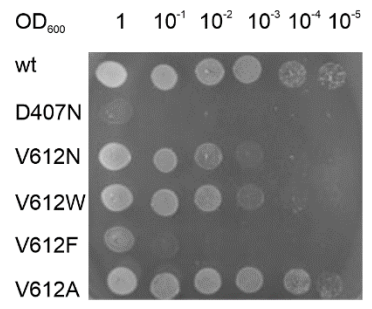

*Erythromycin [20 µg/mL]*

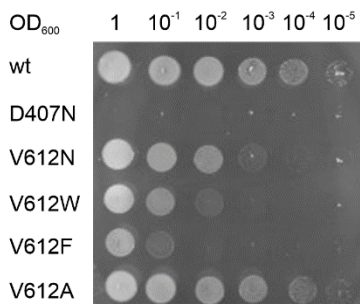

*Novobiocin [10 µg/mL]*

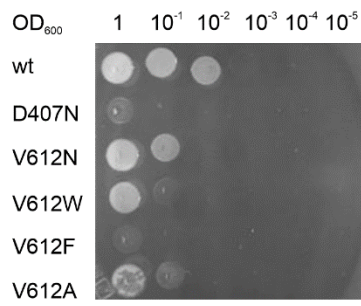

*Fusidic acid [12 µg/mL]*

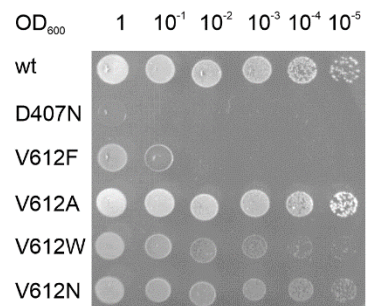

*Doxorubicin [40 µg/mL]*

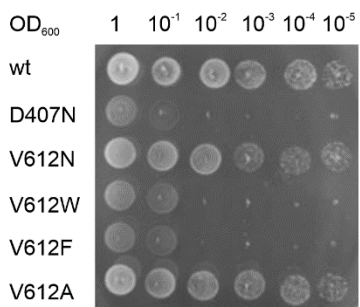

*Hoechst33342 [5 µg/mL]*

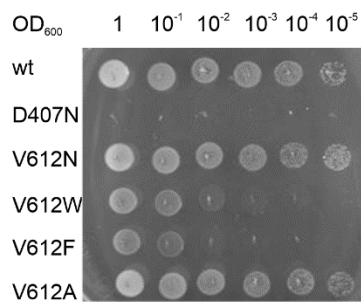

*TPP [300 µg/mL]*

Biological replicate 3, technical replicate 2

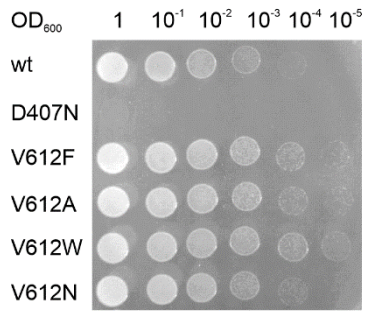

*Chloramphenicol* [1.5 µg/mL]

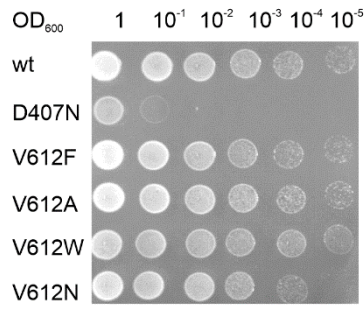

*Thiamphenicol* [12 µg/mL]

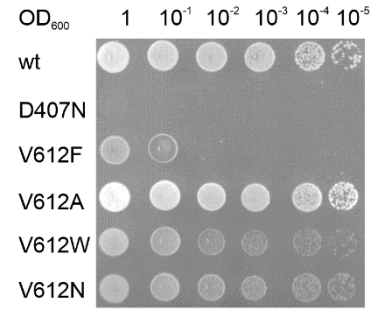

*Doxorubicin* [40 µg/mL]

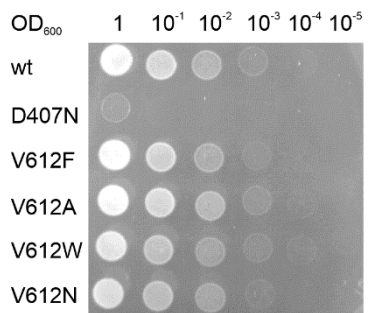

*Tetracycline* [0.3 µg/mL]

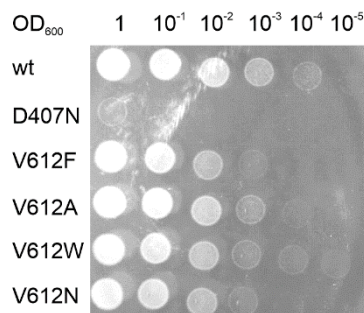

*Doxycycline* [0.5 µg/mL]

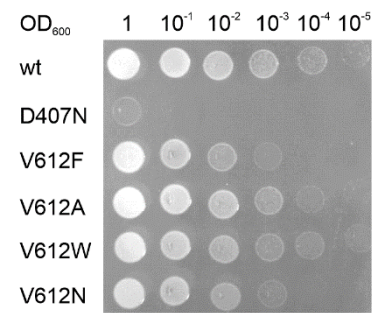

*Minocycline* [0.3 µg/mL]

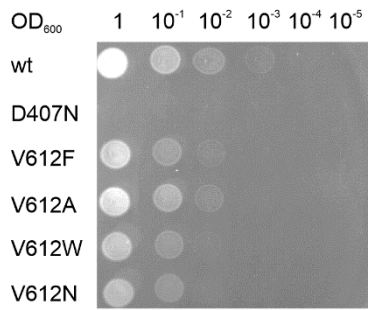

*Chlortetracycline* [0.2 µg/mL]

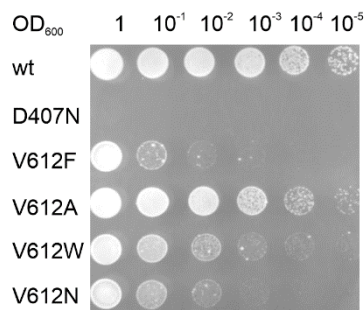

*Oxacillin* [16 µg/mL]
